# Supplementary material for: Identification and Biochemical Characterization of High Mobility Group Protein 20A as a Novel Ca2+/S100A6 Target
Source: MDPI journal article supplement (doi:10.3390/biom11040510), 2021-03-30
Supplement: s1 [file s1]

No.6 plate

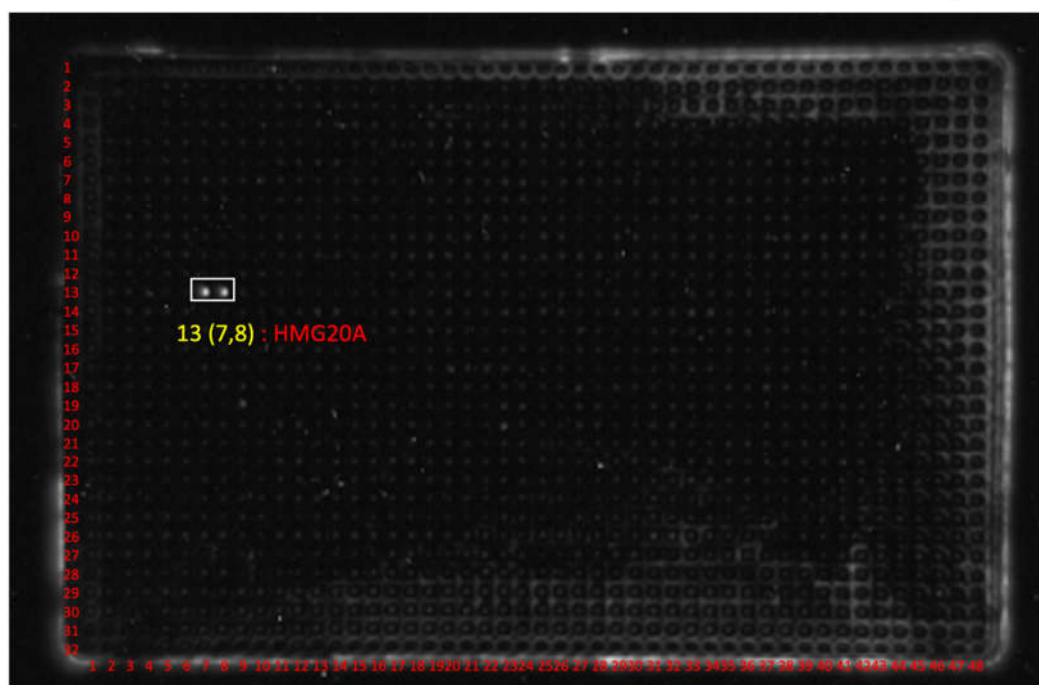

**Supplemental Figure. S1. Identification of HMG20A as an S100A6-binding protein by Protein Active Array® screening.**

The screening result of biotinylated S100A6 binding on the No. 6 array containing 739 duplicate human proteins (01:05,06–32:43,44) with positive signals at 13:7,8 corresponding to HMG20A (high mobility group protein 20A isoform a [*Homo sapiens*], accession number: NP\_060670.1).
